# Supplementary material for: Establishment of Novel Genotoxicity Assay System Using Murine Normal Epithelial Tissue-Derived Organoids
Source: PubMed Central journal article supplement (PMC8638810; doi:10.3389/fgene.2021.768781), 2021-11-18

## *Supplementary Material*

### **1 Supplementary Figures and Tables**

#### **1.1 Supplementary Figures**

**Supplementary Figure 1.** Distribution of spontaneous and PhIP-induced mutations in the coding region of the *gpt* gene in hepatic organoids.

### Hot Spot Mapping

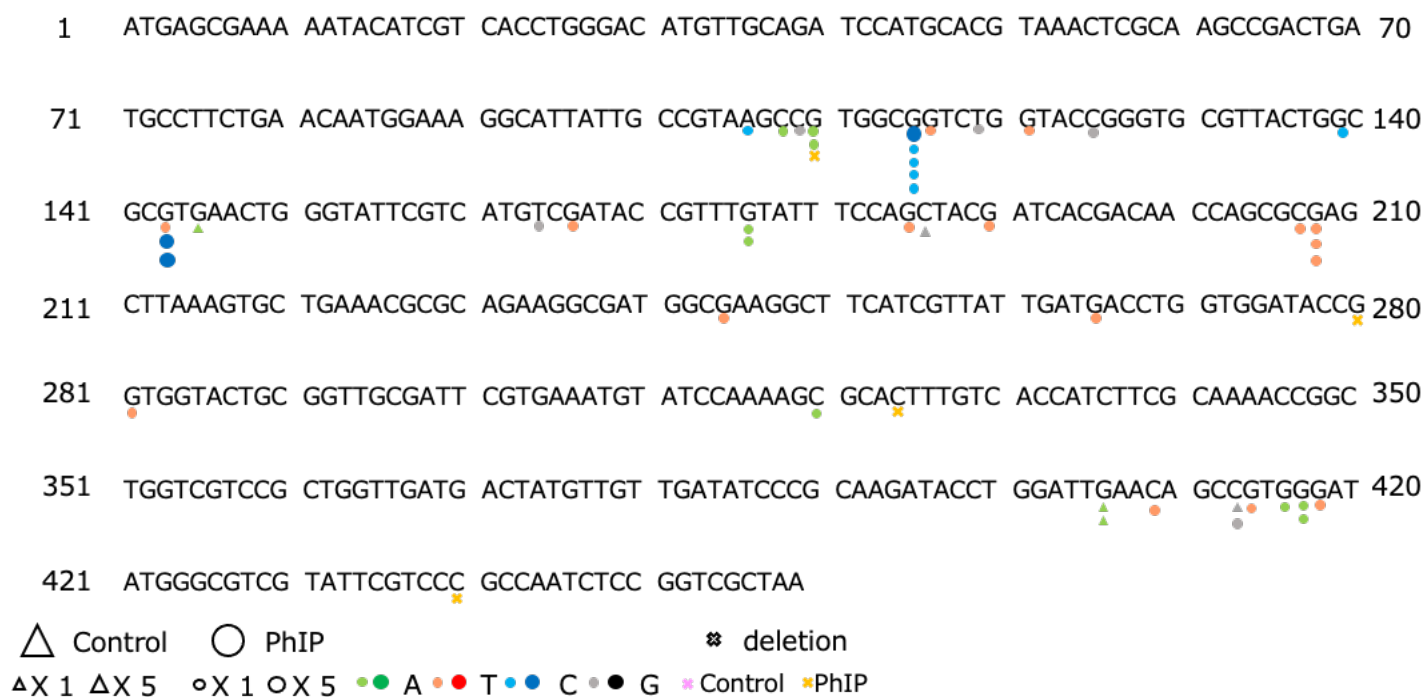

**Supplementary Figure 2.** Relative expression levels of *CYP2E1* in the lung-derived organoids in the absence of the S9 mix. Real-time PCR analysis is used to determine the mRNA expression levels of *CYP2E1*. In untreated controls, values are set at 1.0, and relative levels are expressed as mean  $\pm$  SE ( $n = 6$ ). *GAPDH* mRNA levels are used to normalize data. Data significantly different from the AA(-)/S9(+) group is indicated as \* $p < 0.05$ , \*\* $p < 0.01$ .

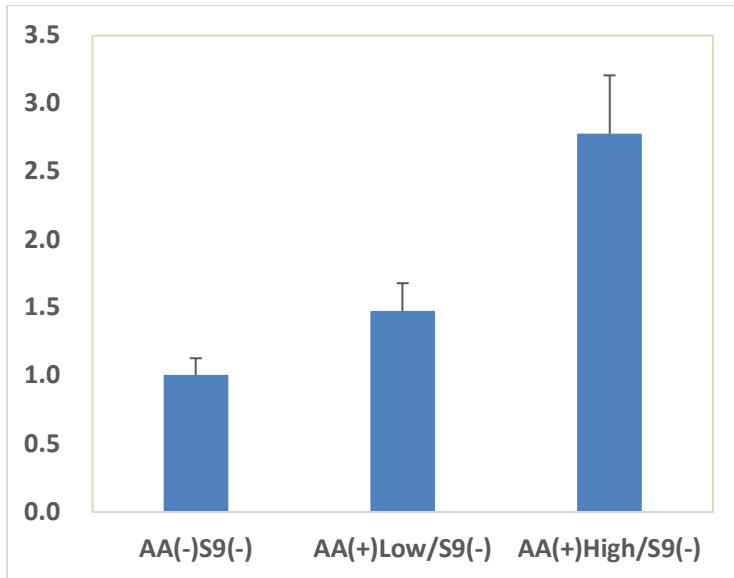

Supplement: Presentation1.pdf [file Presentation1.pdf]
